# Supplementary material
Source: Springer Nature journal article supplement (https://www.springerprofessional.de/resource/supplementary/13638_2014_908_MOESM2_ESM.pdf/11899194)

Maximum Likelihood : Terminated at  $H_1$ 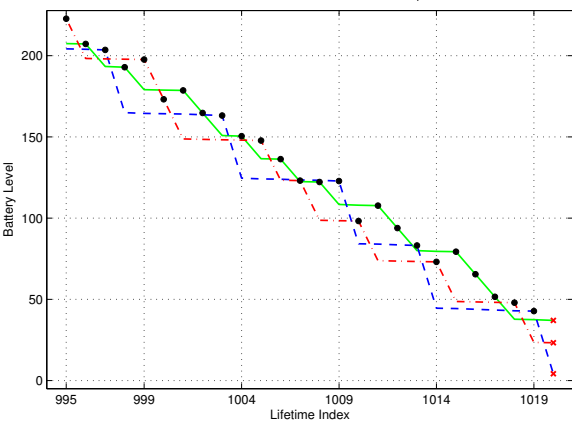Maximum Likelihood :  $H_2$ 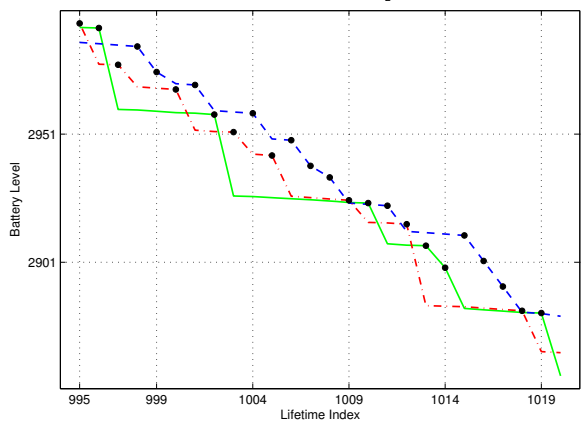Maximum Likelihood :  $H_3$ 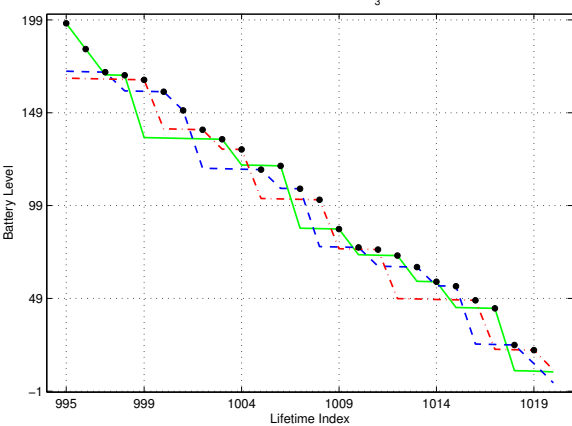Maximum Likelihood :  $H_4$ 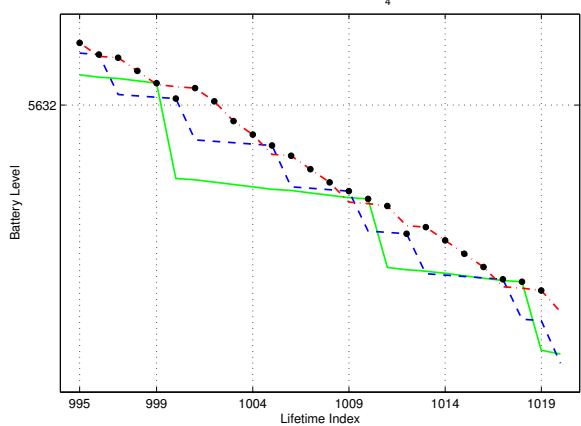Maximum Likelihood :  $H_5$ 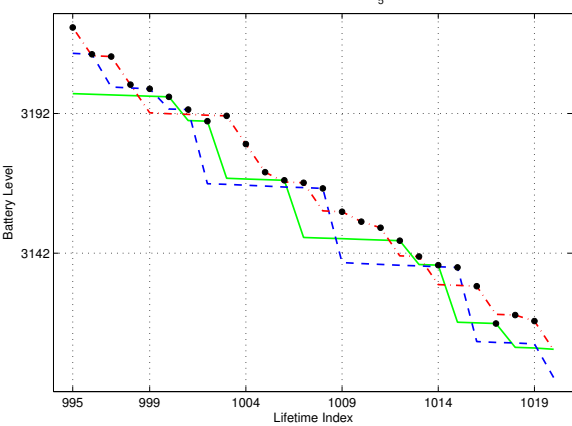Maximum Likelihood :  $H_6$ 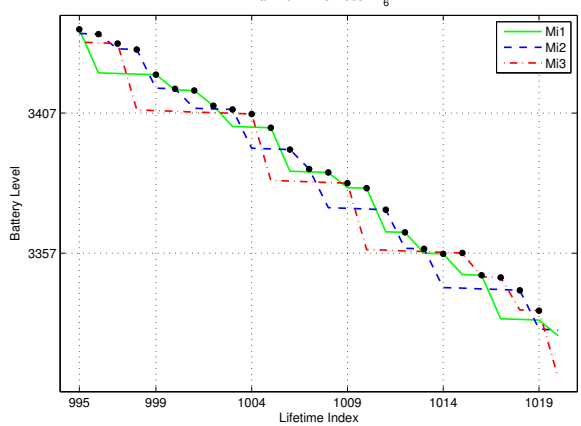

Supplement: MOESM2 [file 11899194]
